# Supplementary material
Source: PubMed Central journal article supplement (PMC11071845)

**Supplementary Figure 3:**  
**Representative flow cytometry pseudocolor dot plots for all analyses of membrane integrity**  
shown in the main manuscript.

**Figure 1**

**C**

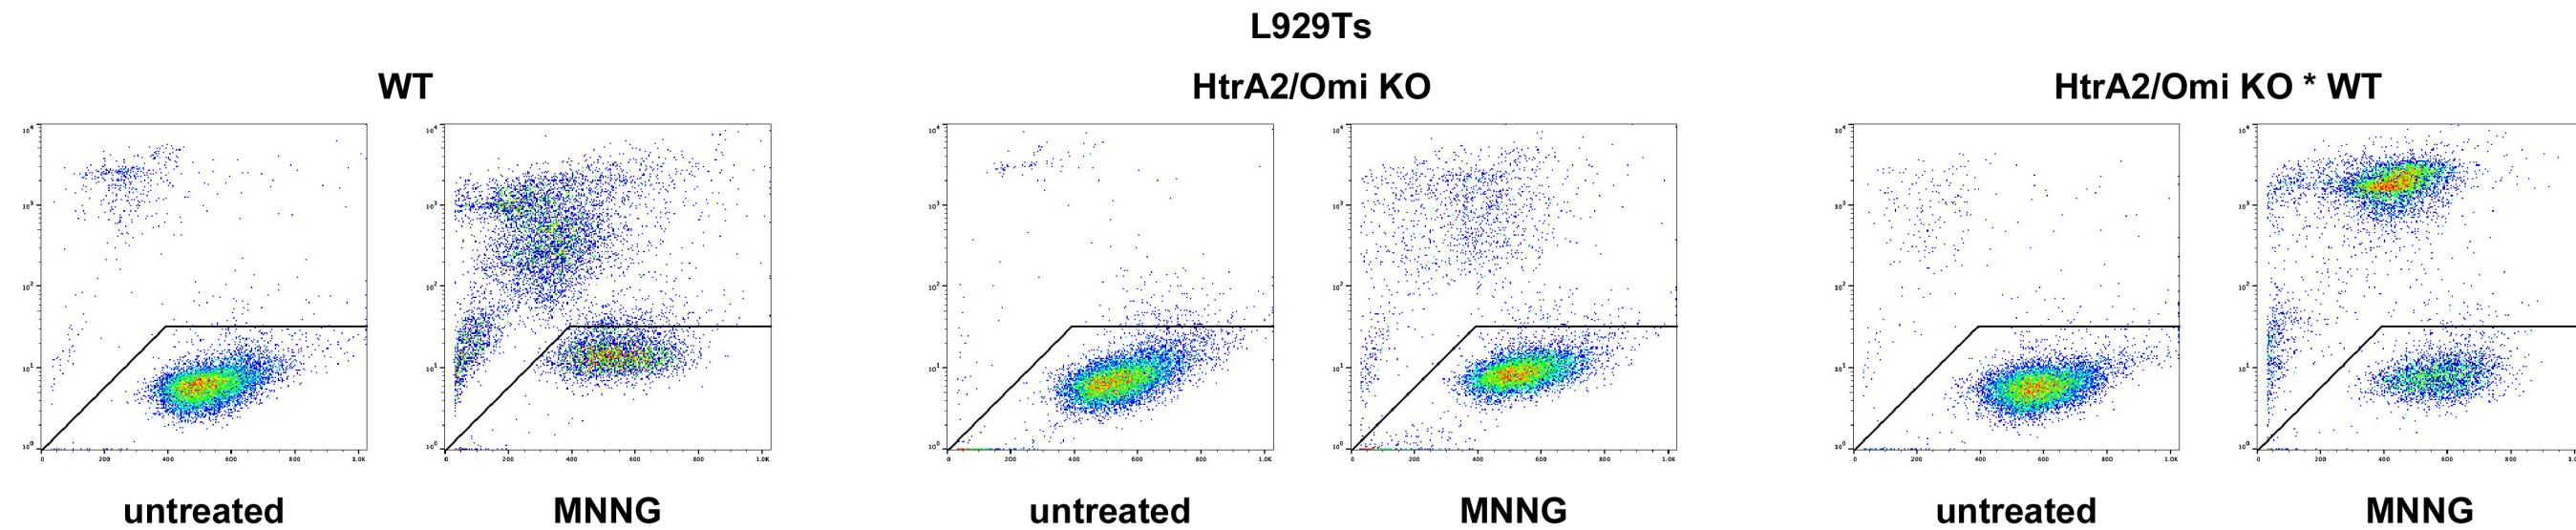

**D**

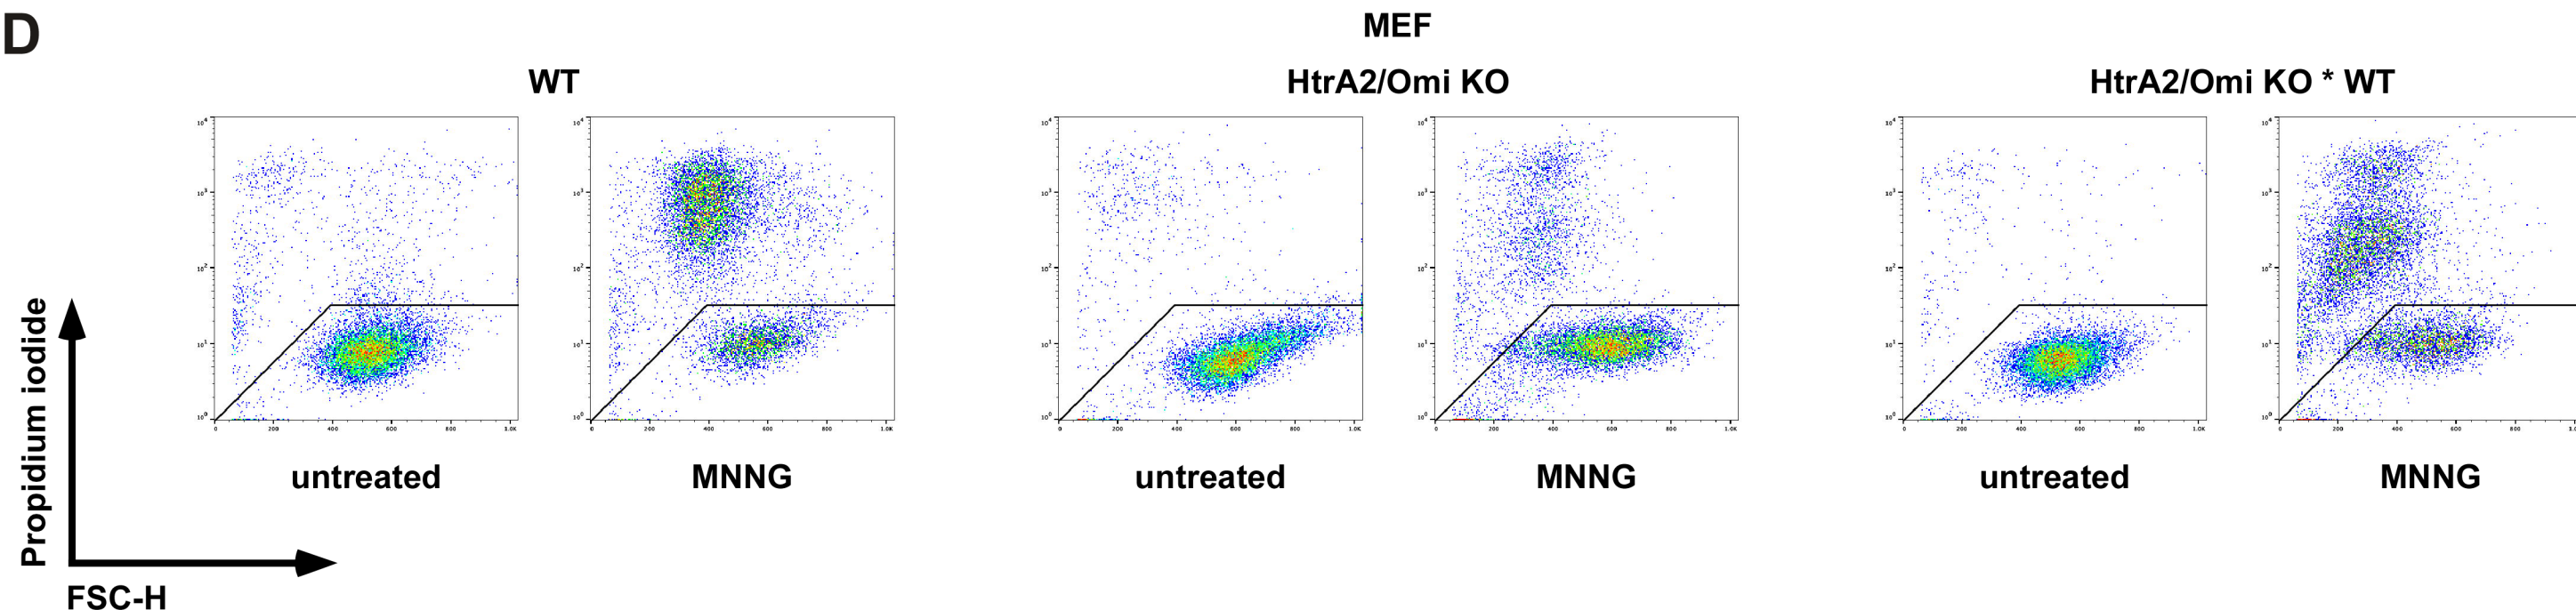

**Figure 2**

**A**

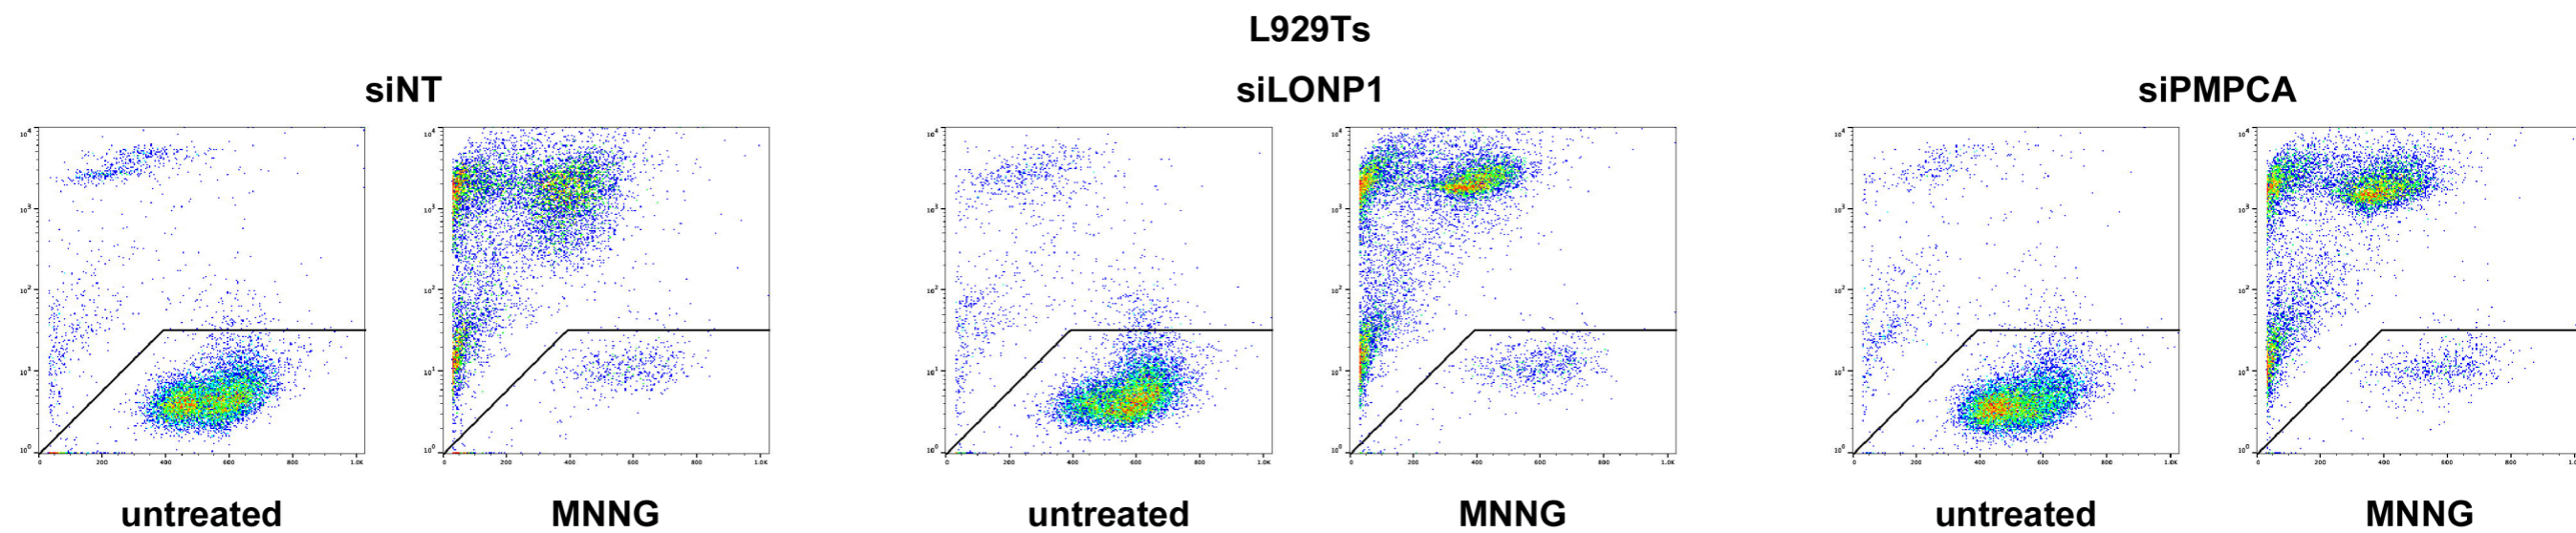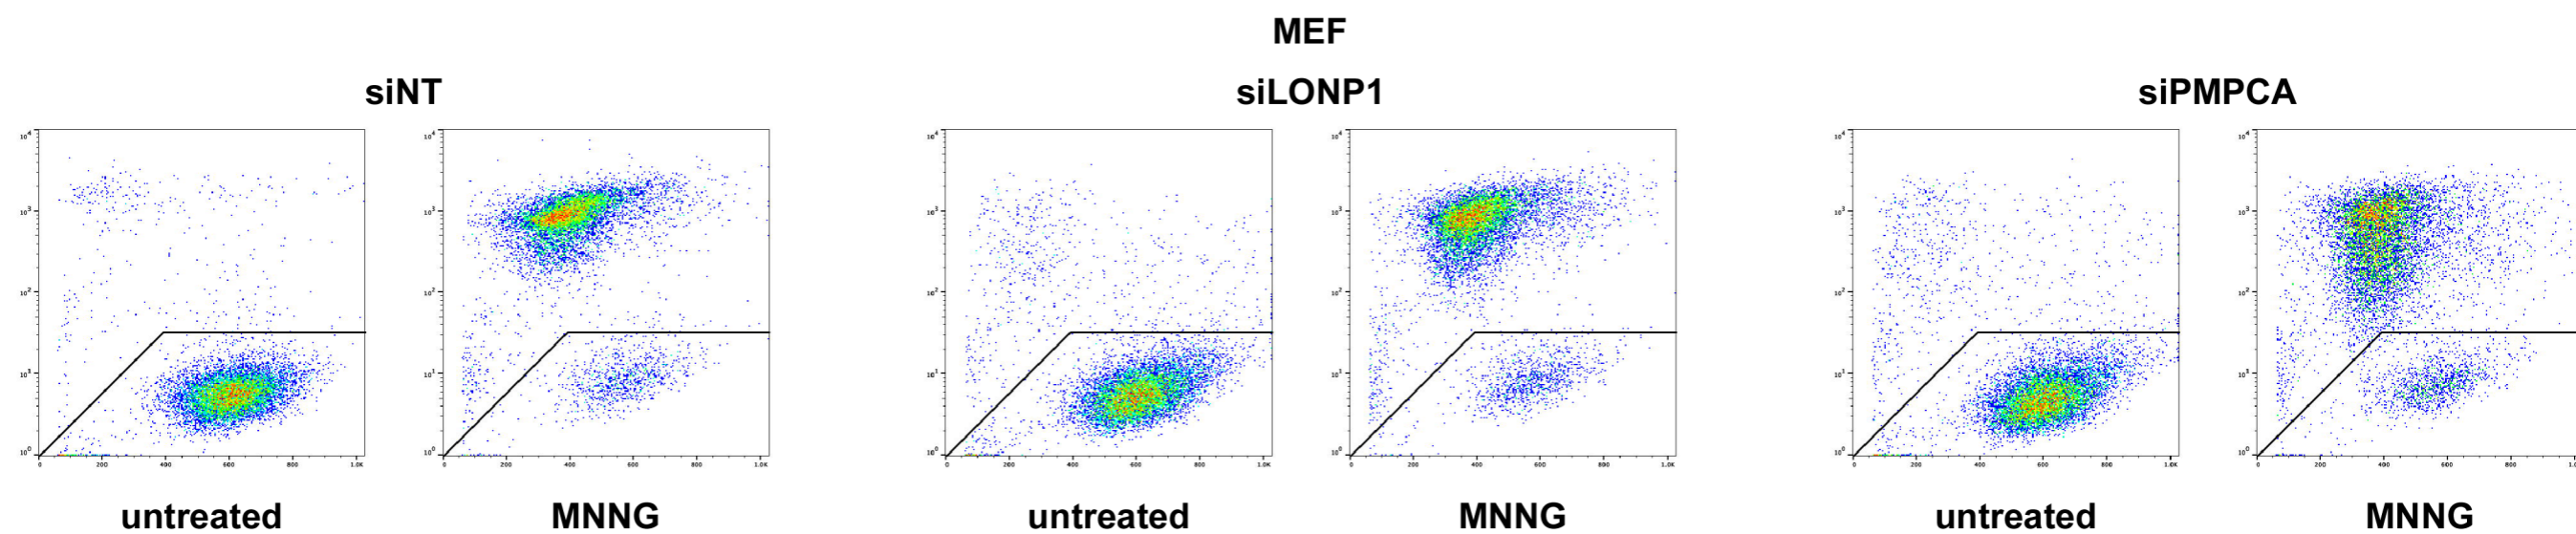

**B**

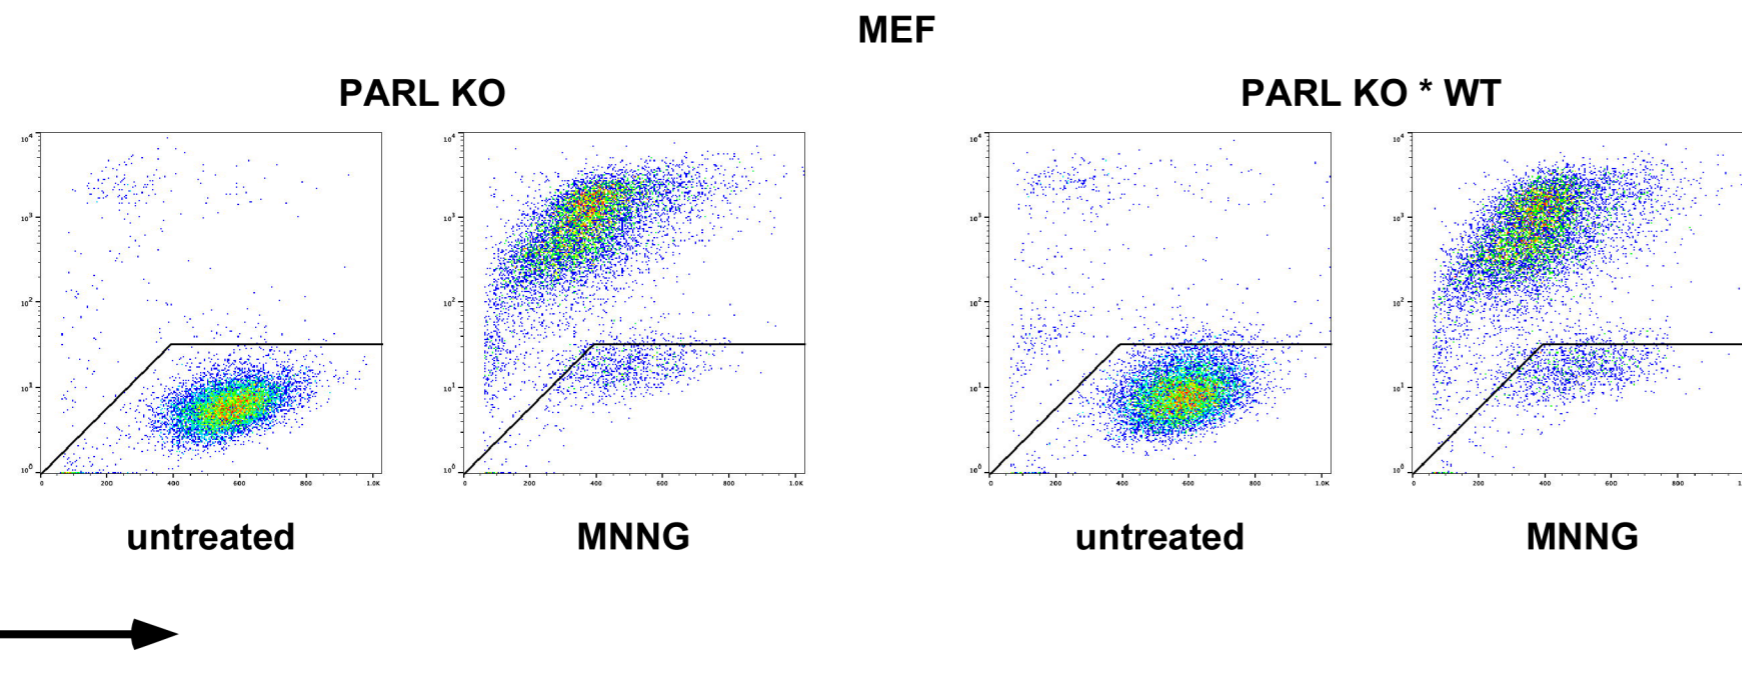



**Figure 3****C**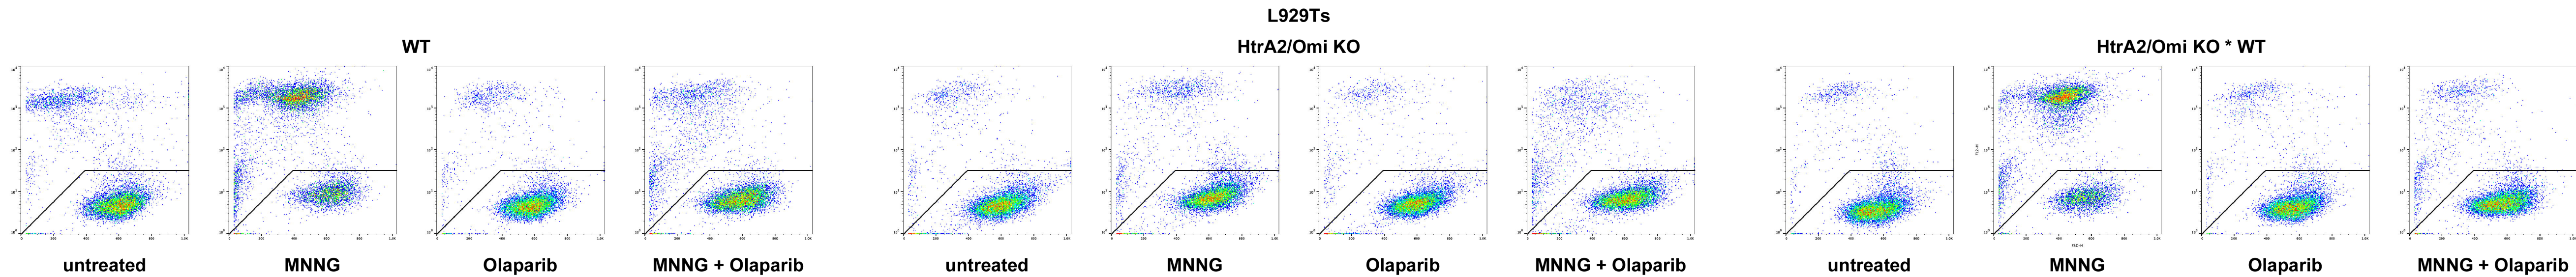**D**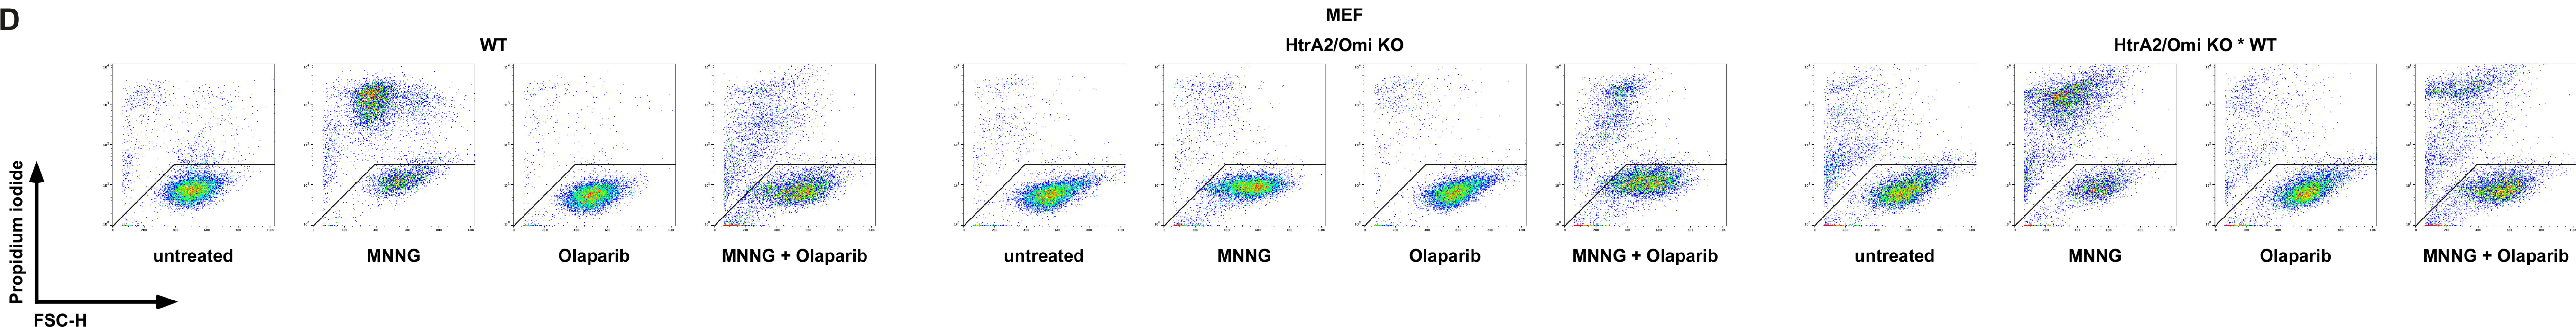



**Figure 4****A**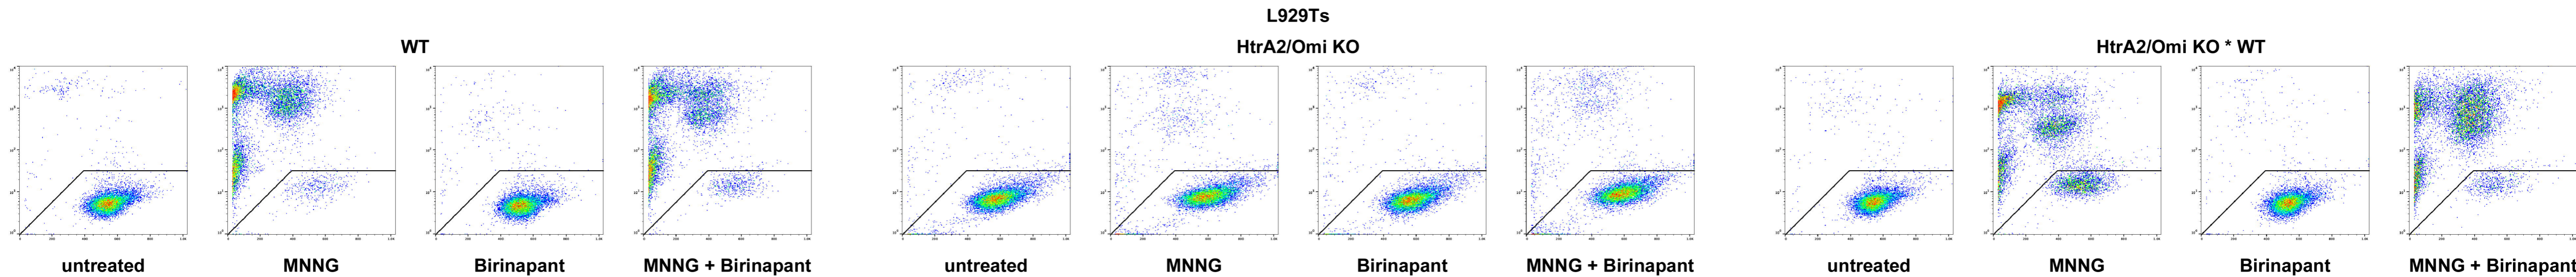**B**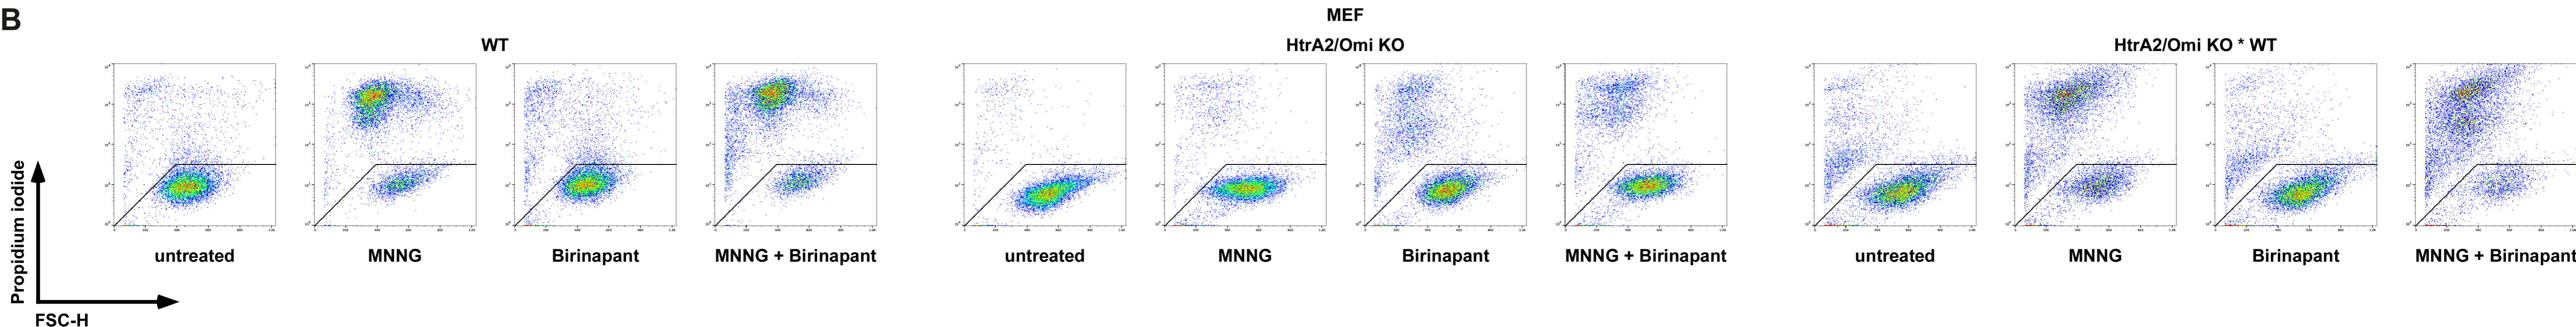



**Figure 5**

**B**

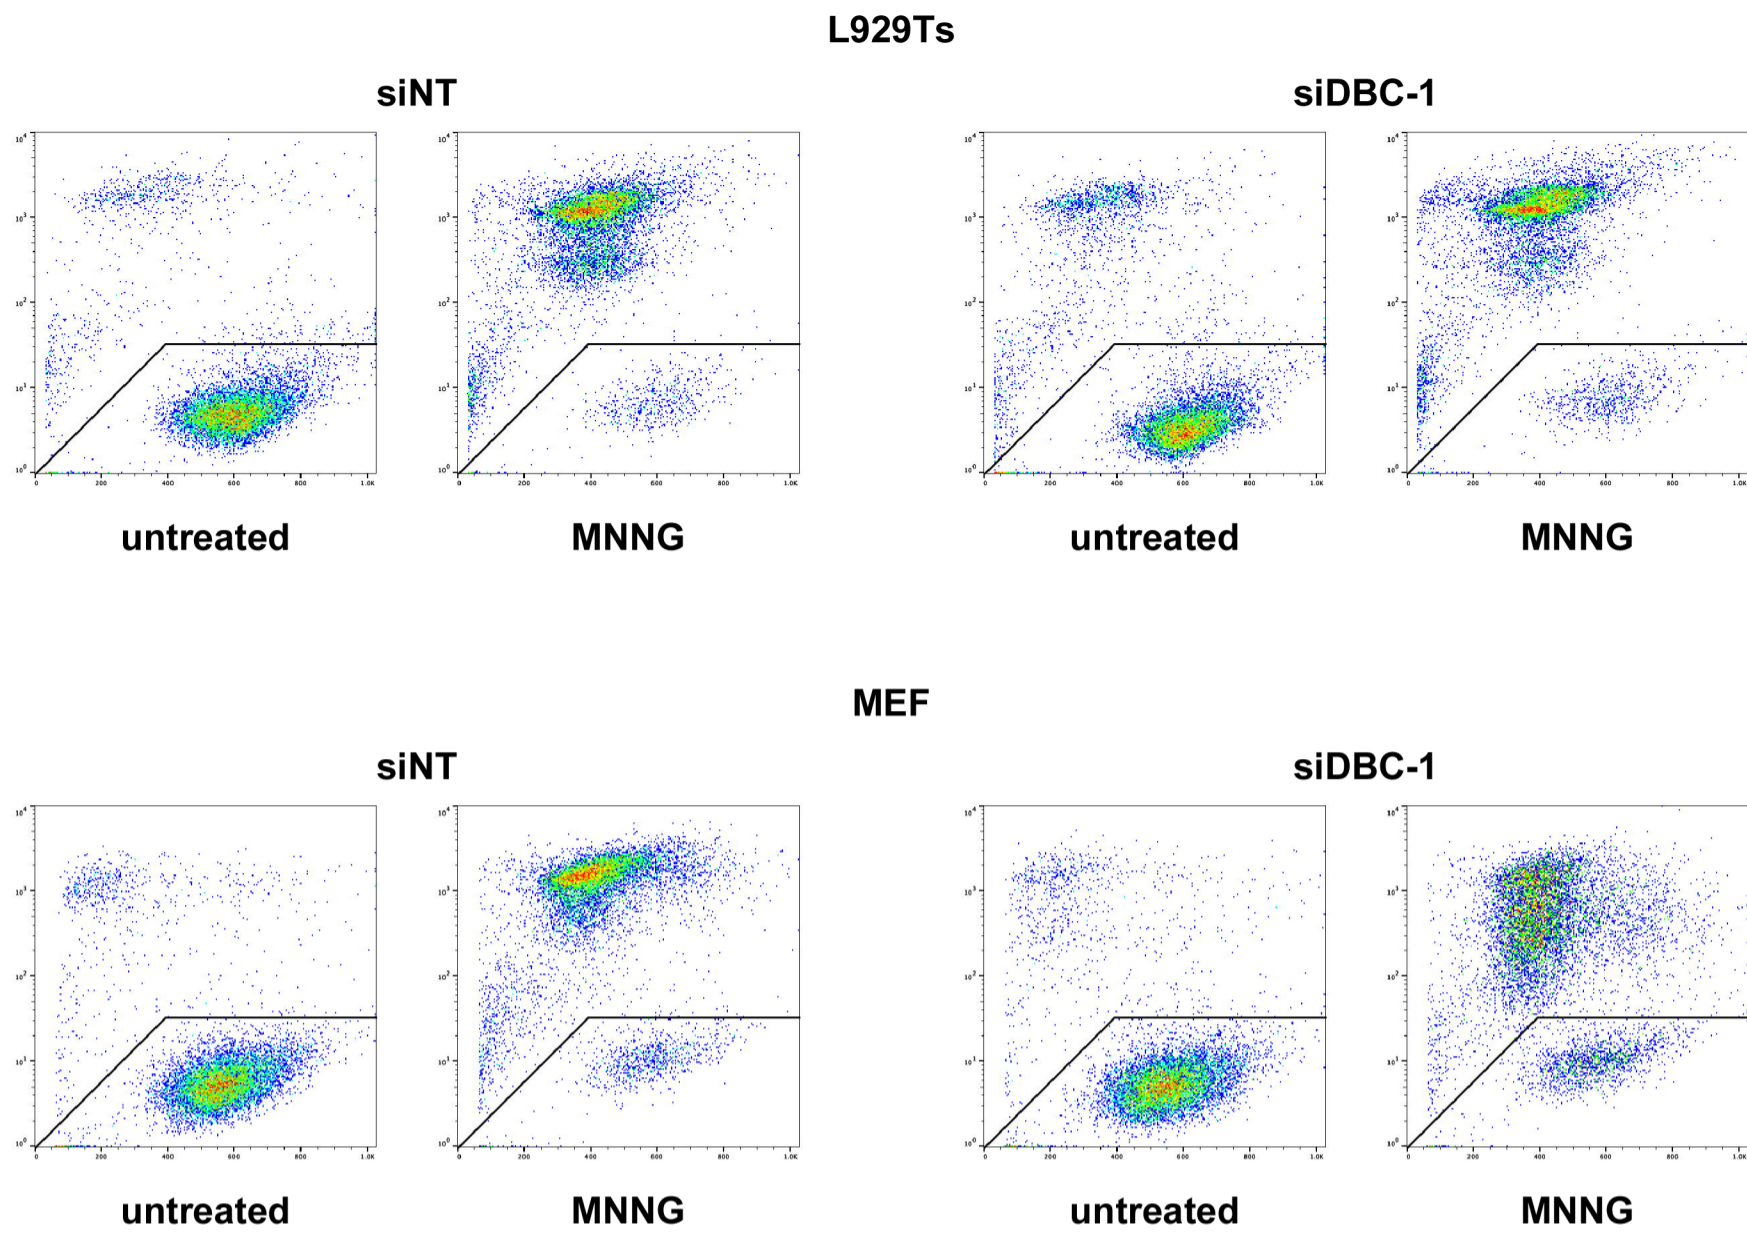

**D**

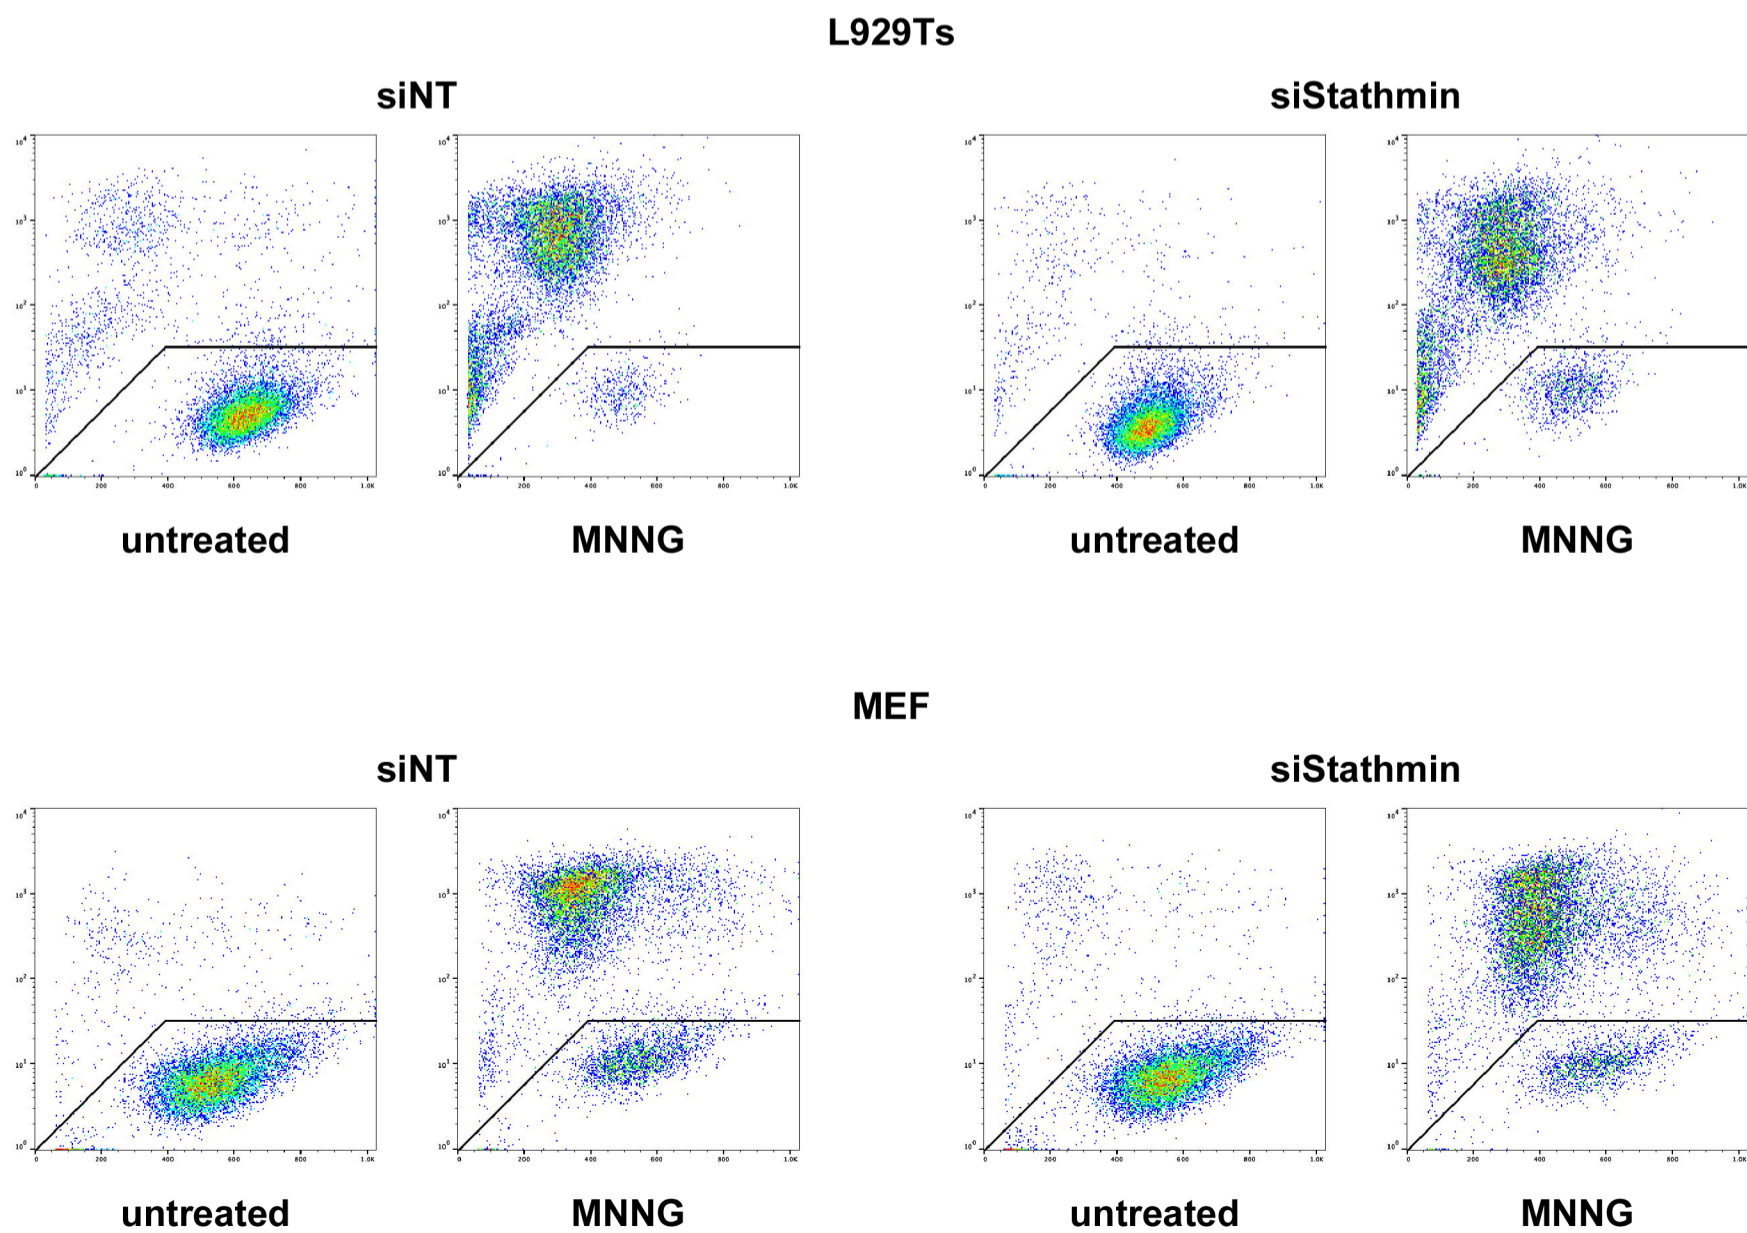

**Propidium iodide**

**FSC-H**

# Figure 7

Time [h]

0

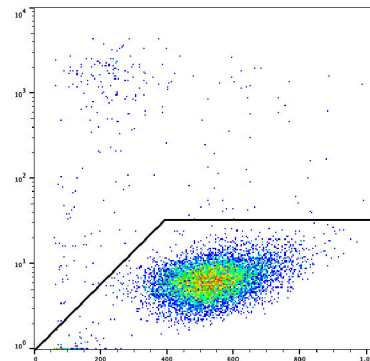

1

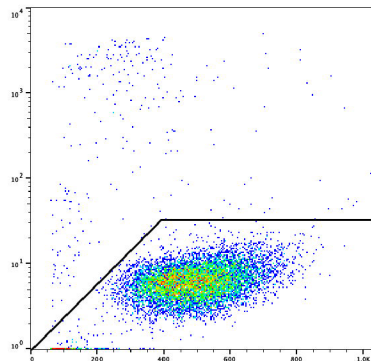

2

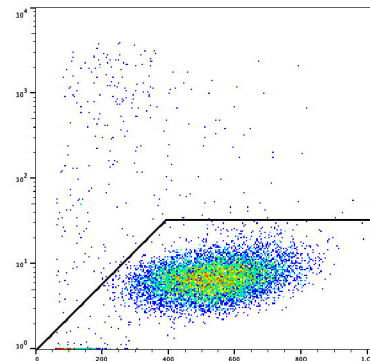

3

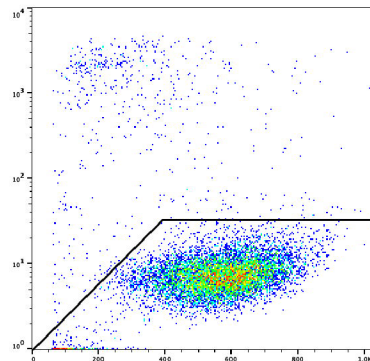

4

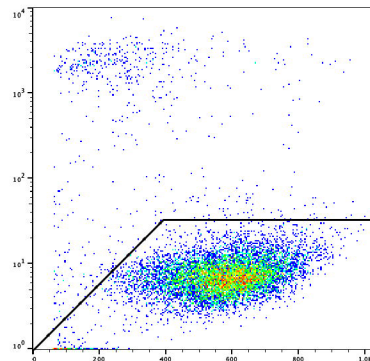

5

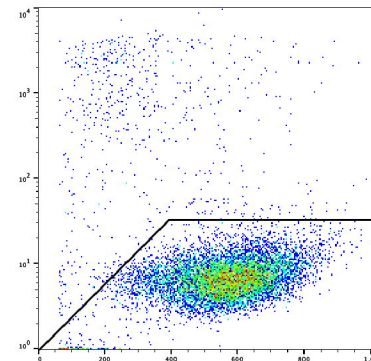

6

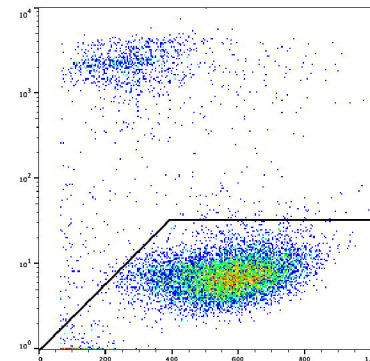

7

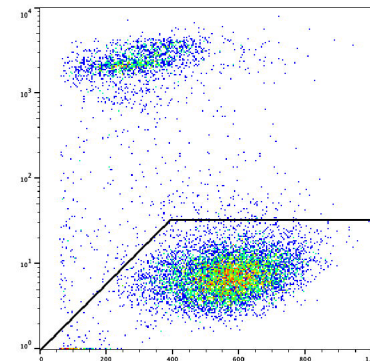

8

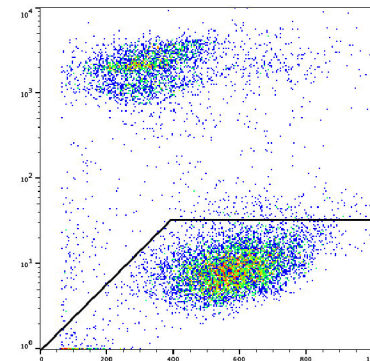

24

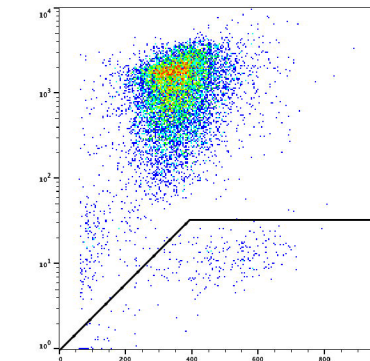

Propidium iodide

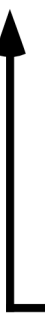

FSC-H





**Figure 9****B**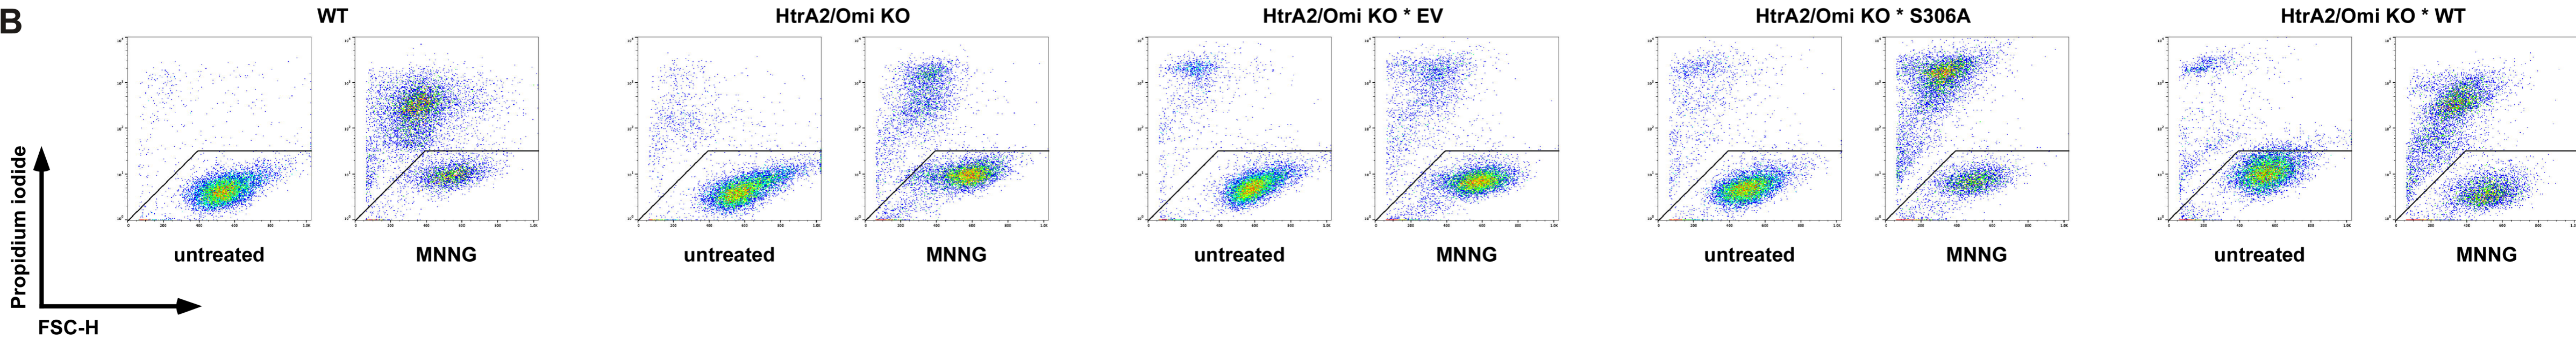**C**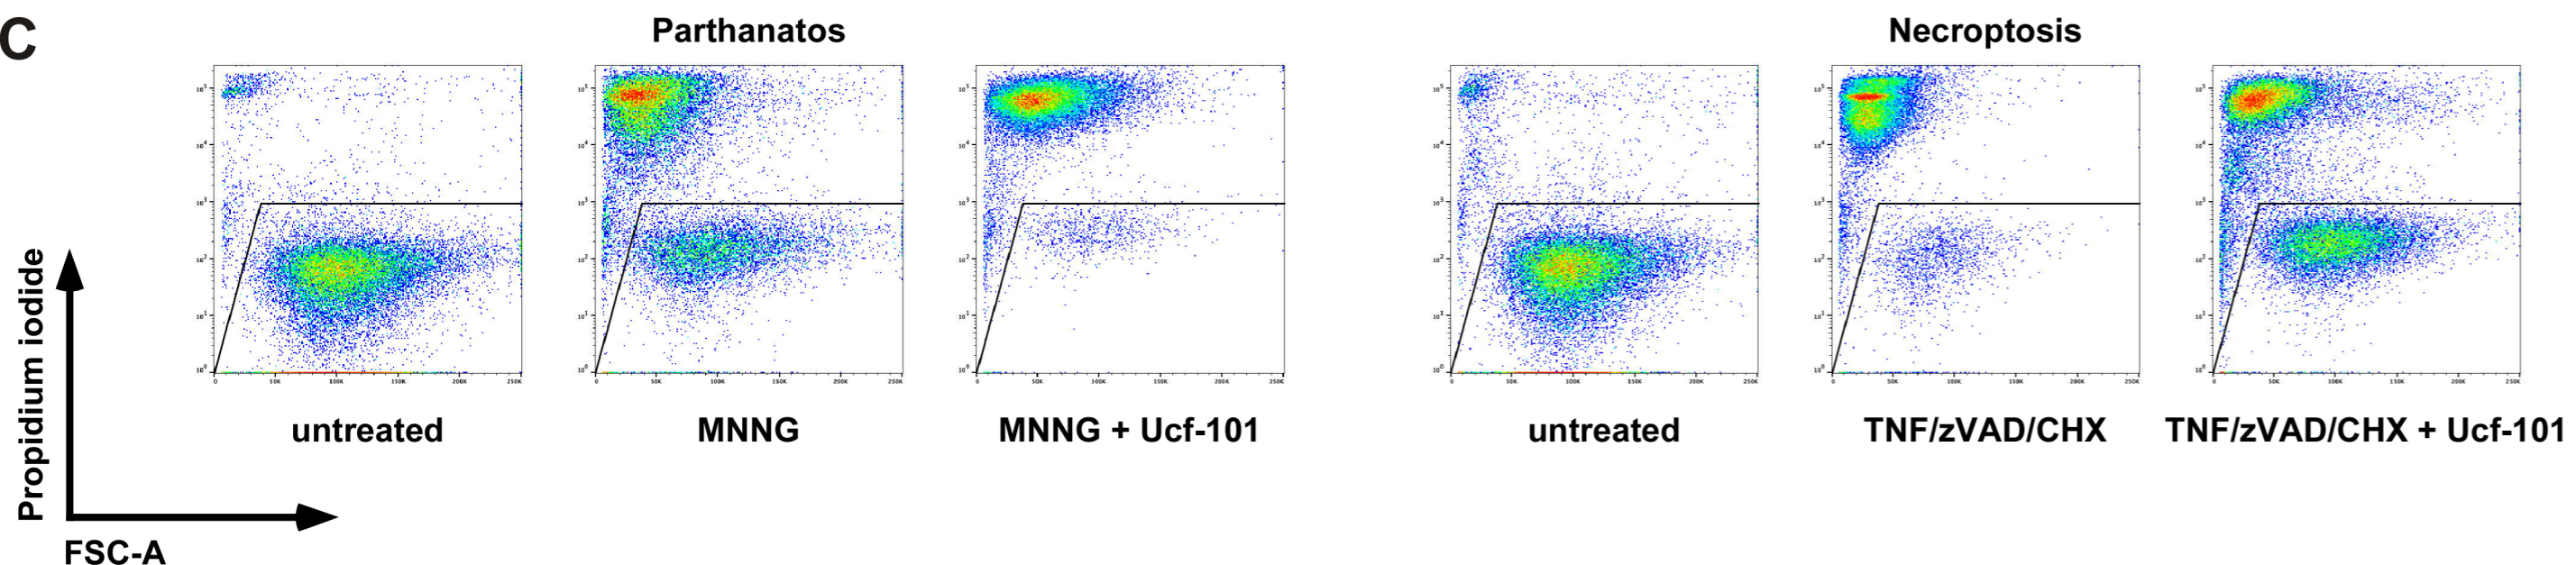

Supplement: 18_2023_4904_MOESM3_ESM.pdf [file 18_2023_4904_MOESM3_ESM.pdf]
